# Supplementary material
Source: Springer Nature journal article supplement (https://www.springermedizin.de/resource/supplementary/13063_2010_451_MOESM7_ESM.pdf/9618242)
Supplement: MOESM7 [file 9618242]

# POTENTIALLY ELIGIBLE

All adult women who are clinically diagnosed with postpartum haemorrhage following vaginal delivery or caesarean section

*CLINICIAN IS "REASONABLY CERTAIN"  
THAT ANTIFIBRINOLYTIC AGENTS  
ARE INDICATED*

*CLINICIAN IS "REASONABLY CERTAIN"  
THAT ANTIFIBRINOLYTIC AGENTS  
ARE CONTRA-INDICATED*

**INELIGIBLE**

**GIVE ANTIFIBRINOLYTIC AGENTS;  
DO NOT RANDOMISE**

**INELIGIBLE**

**DO NOT GIVE ANTIFIBRINOLYTIC AGENTS;  
DO NOT RANDOMISE**

Clinician is  
**"SUBSTANTIALLY UNCERTAIN"**  
as to the appropriateness of  
antifibrinolytic agents in this woman

**RANDOMISE**

TRANEXAMIC ACID

PLACEBO
